# Supplementary material for: Increased Omega-3 Fatty Acid Intake Is Associated with Low Grip Strength in Elderly Korean Females
Source: MDPI journal article supplement (doi:10.3390/nu14122374), 2022-06-08
Supplement: s1 [file s1]

**Table S1.** Relation between omega-3 fatty acid intake and grip strength by sex.

|                          | Grip strength |            |
|--------------------------|---------------|------------|
|                          | Male          | Female     |
| $\alpha$ -linolenic acid | 0.0002634**   | 0.0000100  |
| EPA                      | -0.0003371    | 0.0005556  |
| DHA                      | -0.0000474    | 0.0003947* |
| EPA+DHA                  | -0.0000632    | 0.0002467  |
| Total omega-3 PUFA       | 0.1818593**   | 0.0302201  |

Total data was additionally adjusted for age, BMI, household income, education level, marital status, smoking status, drinking status, and physical activity status (walking and muscle exercise)

p<0.05 \*: p<0.01 \*\*
